# Supplementary material for: Mesenchymal stromal cells‐derived small extracellular vesicles modulate DC function to suppress Th2 responses via IL‐10 in patients with allergic rhinitis
Source: PubMed Central journal article supplement (PMC9545324; doi:10.1002/eji.202149497), 2022-04-24
Supplement: EJI-52-1129-s001.pdf [file EJI-52-1129-s001.pdf]

**Fig. S1**

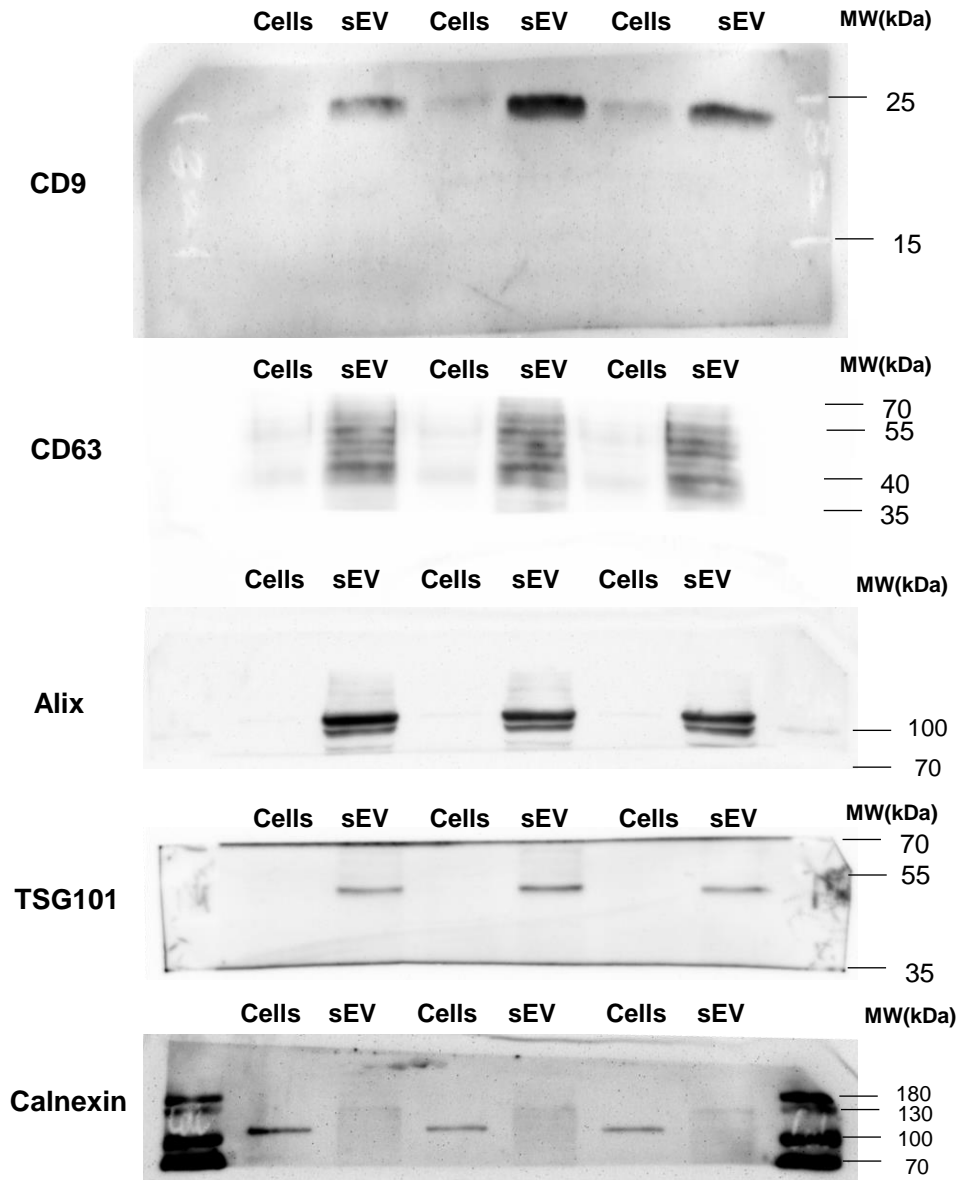

**Figure S1. The definite expressions of EV markers by Western Blot.** CD9, CD63, Alix and TSG101 were positive and Calnexin was negative in the sEV derived from MSCs as determined by Western Blot. The raw data were shown above.

**Fig. S2**

**A**

*Gate strategy for DC detection*

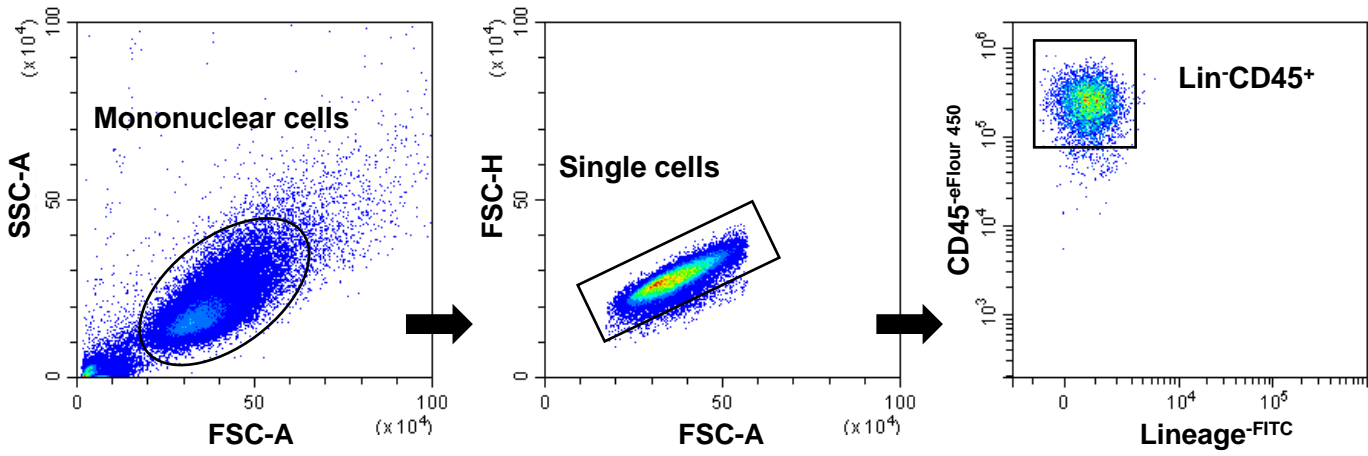

**B**

*Gate strategy for T cell detection*

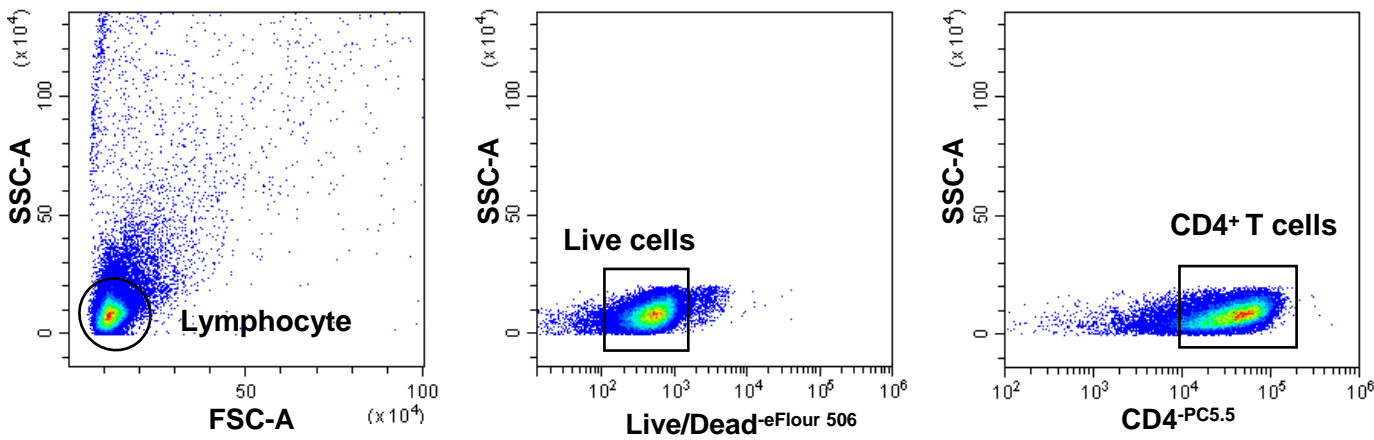

**Figure S2. The Gating strategy for DC (A) and T cell (B) detection.** DCs were determined in the gate of Lin-CD45<sup>+</sup> cells. T cells were determined in the gate of CD4<sup>+</sup> cells.

**Fig. S3**

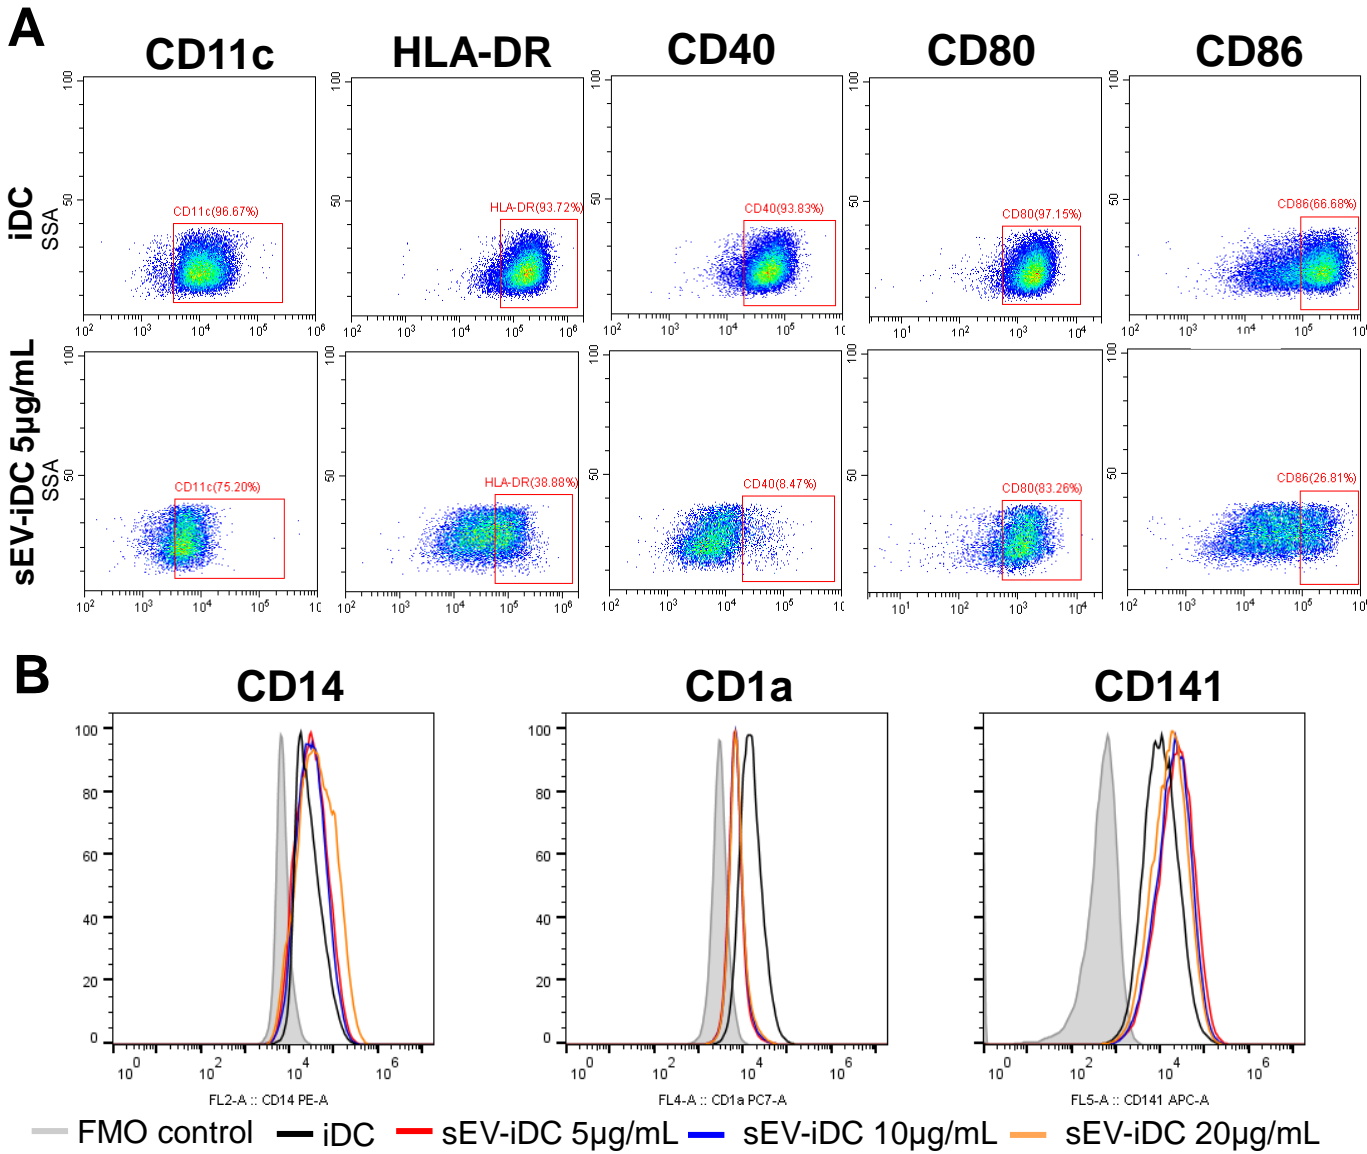

**Figure S3. The representative pictures of MSC-sEV on the differentiation of DCs.** CD14<sup>+</sup> monocytes were cultured in the presence or absence of MSC-sEV (5, 10 or 20 µg/mL) for 5 days. **A**, Dot plots of markers (CD11c, HLA-DR, CD40, CD80, and CD86) were determined by flow cytometry. **B**, The expression of CD14, CD1a, and CD141 was determined by flow cytometry. DCs: dendritic cells, FMO: fluorescence minus one, MSC: mesenchymal stromal cells, sEV: small extracellular vesicles.

**Fig. S4**

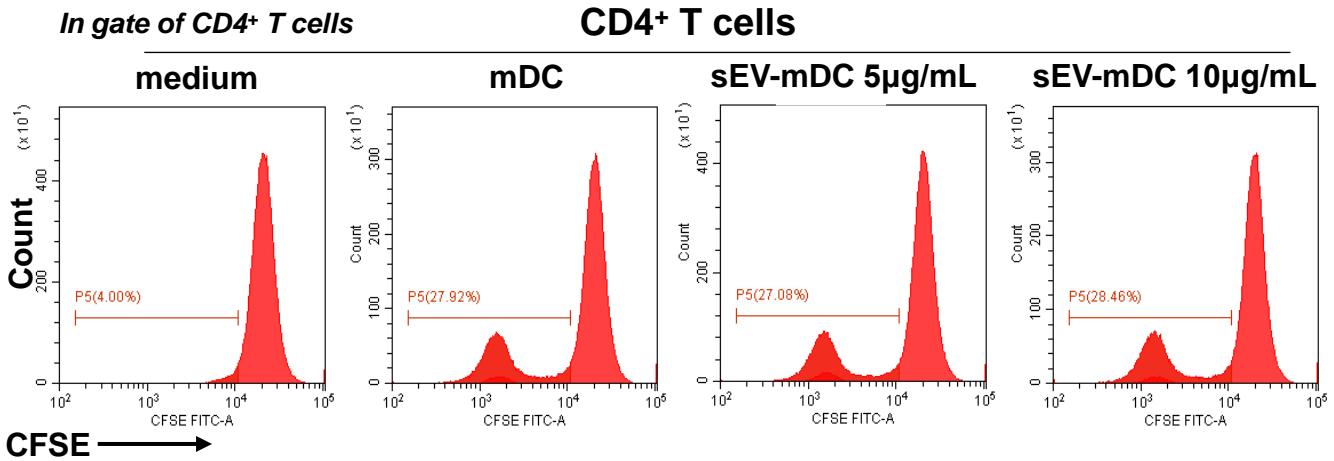

**Figure S4. MSC-sEV did not affect the promoting ability of mDCs on T cell proliferation.** CFSE-labeled CD4<sup>+</sup> T cells were co-cultured with or without mDCs and sEV-mDCs for 5 days. The proliferation rate of T cells was determined by flow cytometry. CFSE: carboxyfluorescein succinimidyl ester, mDCs: mature dendritic cells; MSC: mesenchymal stromal cells; sEV: small extracellular vesicles.

**Fig. S5**

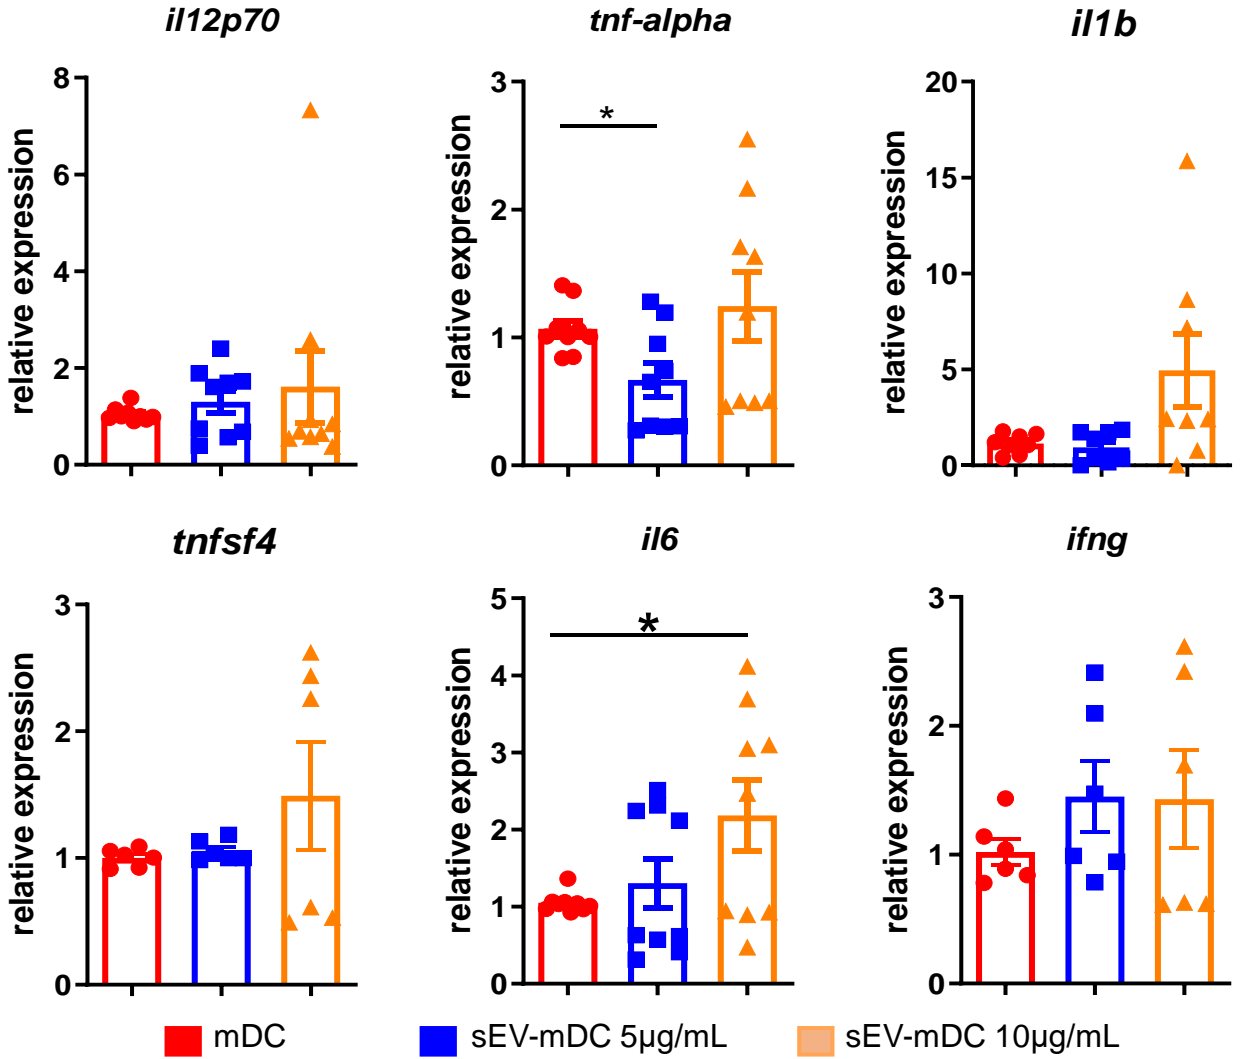

**Figure S5.** The levels of IL-12p70, TNF- $\alpha$ , IL-1 $\beta$ , OX-40L (encoded by *tnfsf4*), IL-6 and IFN- $\gamma$  mRNA in mDCs treated with or without sEV. Data are shown as mean  $\pm$  SEM (n = 6 - 9). \* $P < 0.05$ . mDCs: mature dendritic cells; sEV: small extracellular vesicles.

# Fig. S6

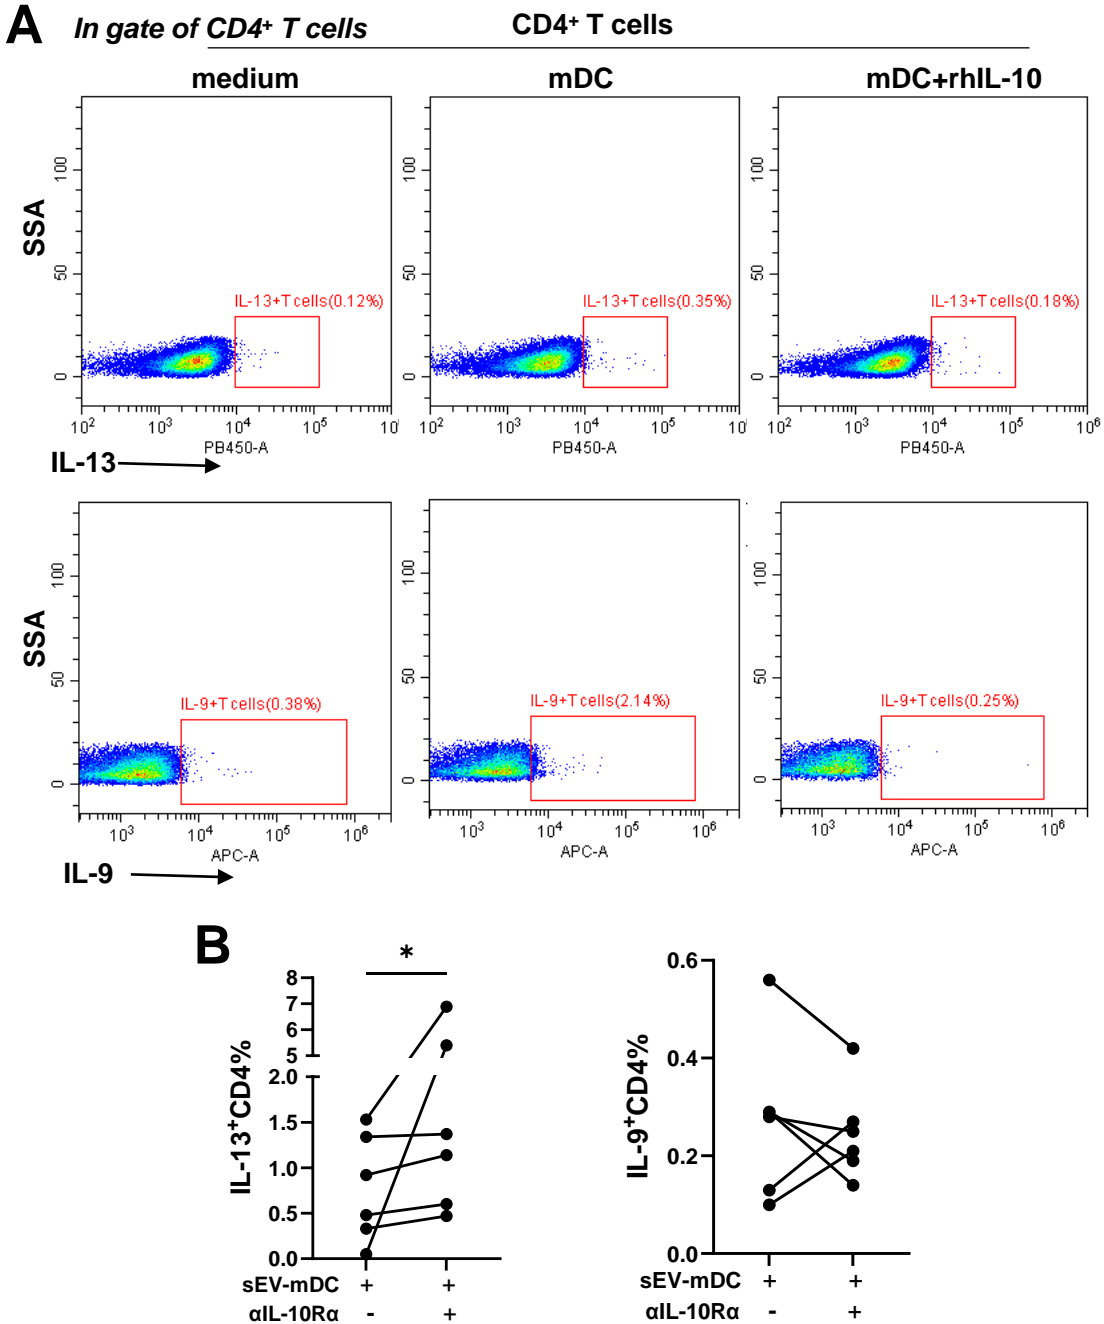

**Figure S6. IL-10 was responsible for the immunomodulatory effects of sEV-mDCs on T cells.** **A**, The dot plots of intracellular IL-9 and IL-13 in T cells in the addition of rhIL-10 (10 ng/mL) antibody to the co-cultures (n = 6). **B**, The bar graphs of intracellular IL-9 and IL-13 in T cells with the treatment of anti-IL-10Rα blocking antibody (5 μg/mL) to the co-cultures (n = 6). Data are representative of collated data of six donors for T cell isolation and three donors for DC generation, all from buffy coat (mean ± SEM). \*P < 0.05, paired t-test. mDCs: mature dendritic cells; MSC: mesenchymal stromal cells; sEV: small extracellular vesicles.
